# Supplementary material for: Predicting global distributions of eukaryotic plankton communities from satellite data
Source: Springer Nature journal article supplement (doi:10.1038/s43705-023-00308-7), 2023-09-22
Supplement: MOESM3 [file 43705_2023_308_moesm3_esm.pdf › 43705_2023_308_moesm3_esm.pdf]

**Table S1.** Machine learning methods and their hyperparameters.

| Method                                   | Scikit-learn implementation             | Hyperparameters                                                                                                                                        |
|------------------------------------------|-----------------------------------------|--------------------------------------------------------------------------------------------------------------------------------------------------------|
| K-nearest Neighbors                      | sklearn.neighbors.KNeighborsClassifier  | Number of neighbors (1, 2, ..., 9)                                                                                                                     |
| Naïve Bayes (Gaussian)                   | sklearn.naive_bayes.GaussianNB          | Smoothing parameter ( $10^{-4}$ , $10^{-3}$ , ..., $10^3$ )                                                                                            |
| Multilayer Perceptron (one hidden layer) | sklearn.neural_network.MLPClassifier    | Activation function (identity, logistic, tanh, ReLU), Hidden layer size (10, 20, 30, 40), L2 penalty parameter ( $10^{-6}$ , $10^{-5}$ , ..., $10^3$ ) |
| Random Forest                            | sklearn.ensemble.RandomForestClassifier | Number of trees (10, 100, 1000, 10000)                                                                                                                 |
| Support Vector Machine                   | sklearn.svm.SVC                         | Kernel (linear, RBF), Coefficient of RBF kernel ( $10^{-4}$ , $10^{-3}$ , ..., $10^3$ ), L2 penalty parameter ( $10^{-4}$ , $10^{-3}$ , ..., $10^3$ )  |

**Table S2.** Performance of machine learning methods on community type prediction using all 17 satellite-derived parameters.

| Method                 | Leave-one-out cross-validation |                      | Buffered cross-validation |                      |
|------------------------|--------------------------------|----------------------|---------------------------|----------------------|
|                        | Accuracy                       | ROC-AUC <sup>a</sup> | Accuracy                  | ROC-AUC <sup>a</sup> |
| K-nearest Neighbors    | 0.56                           | 0.86                 | 0.47                      | 0.76                 |
| Naïve Bayes            | 0.55                           | 0.85                 | 0.50                      | 0.81                 |
| Multilayer Perceptron  | 0.60                           | 0.88                 | 0.54                      | 0.82                 |
| Random Forest          | 0.63                           | 0.89                 | 0.50                      | 0.81                 |
| Support Vector Machine | 0.67                           | 0.90                 | 0.54                      | 0.83                 |

a: Micro-average area under the ROC curve.
